# Supplementary material for: Engineering of polystyrene-supported acid–base catalysts for aldol condensation in water
Source: Royal Society of Chemistry journal article supplement (doi:10.1039/d2nj01241c), 2022-01-01
Supplement: d2nj01241c1.pdf [file d2nj01241c1.pdf]

## *Supporting Information*

# **Engineering of Polystyrene-Supported Acid-Base Catalysts for Aldol Condensation in Water**

Wei Xiao,<sup>†</sup> Zihao Wang,<sup>†</sup> Jinxiang Yang,<sup>†</sup> Tianyou Chen,<sup>\*,†</sup> Changfeng Yi,<sup>†</sup> and Zushun Xu<sup>\*\*†</sup>

<sup>†</sup> Ministry of Education Key Laboratory for the Green Preparation and Application of Functional Materials, Hubei Key Laboratory of Polymer Materials, School of Materials Science and Engineering, Hubei University, Wuhan 430062, China

\* E-mail: [changfengyi@hubu.edu.cn](mailto:changfengyi@hubu.edu.cn)

\*\* E-mail: [zushunxu@hubu.edu.cn](mailto:zushunxu@hubu.edu.cn)

## Table of Contents

|                                         |     |
|-----------------------------------------|-----|
| 1. Nomenclature and Abbreviations ..... | S3  |
| 2. Organic Synthesis .....              | S4  |
| 3. NMR Data .....                       | S7  |
| 4. DLS Data .....                       | S15 |
| 5. TEM Image .....                      | S19 |
| 6. FT-IR spectra .....                  | S20 |
| 7. Condensation reactions.....          | S21 |
| 8. References .....                     | S22 |

# 1. Nomenclature and Abbreviations

Table S1. Nomenclature and abbreviations

| Abbreviation | Name/description                        |
|--------------|-----------------------------------------|
| DCM          | dichloromethane                         |
| DLS          | dynamic light scattering                |
| DMF          | <i>N,N</i> -dimethylformamide           |
| EtOAc        | ethyl acetate                           |
| FT-IR        | Fourier-transform infrared spectroscopy |
| GPC          | gel permeation chromatography           |
| $M_n$        | number average molecular weight         |
| $M_w$        | weight average molecular weight         |
| NMR          | nuclear magnetic resonance              |
| PDI          | polydispersity index                    |
| PE           | petroleum ether                         |
| TEM          | transmission electron microscopy        |
| THF          | tetrahydrofuran                         |
| TLC          | thin-layer chromatography               |

## 2. Organic Synthesis

**Scheme S1.** Synthesis of **1**.

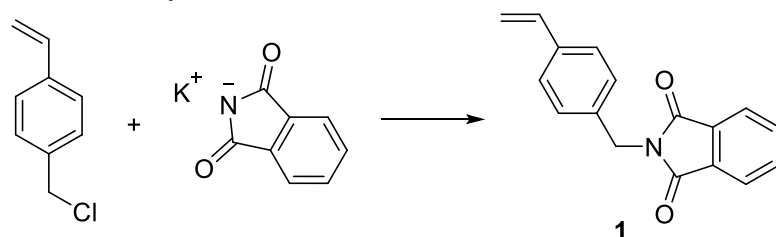

Compound **1** was synthesized (Scheme S1) according to a previously reported procedure.<sup>1</sup> To a flask was added 4-vinylbenzyl chloride (10.77 g, 70.36 mmol), *N,N*-dimethylformamide (40 mL), and potassium phthalimide (13.02 g, 70.36 mmol). The reaction mixture was stirred at room temperature for 24 h. After which, the solution was added to an aqueous solution of NaOH (1 M, 1 L), and the formed precipitate was collected by filtration, and dissolved in ethyl acetate (100 mL). The solvent was removed under reduced pressure and the desired product was recrystallized from methanol three times to afford **1** as a white crystal (5.80 g, 22.04 mmol, 22 %). <sup>1</sup>H NMR (400 MHz, Chloroform-*d*)  $\delta$  7.84 (dd, *J* = 5.5, 3.0 Hz, 2H), 7.70 (dd, *J* = 5.5, 3.0 Hz, 2H), 7.41 – 7.33 (m, 4H), 6.67 (dd, *J* = 17.6, 10.9 Hz, 1H), 5.71 (d, *J* = 18.4 Hz, 1H), 5.22 (d, *J* = 10.9 Hz, 1H), 4.83 (s, 2H).

**Scheme S2.** Synthesis of **2**.

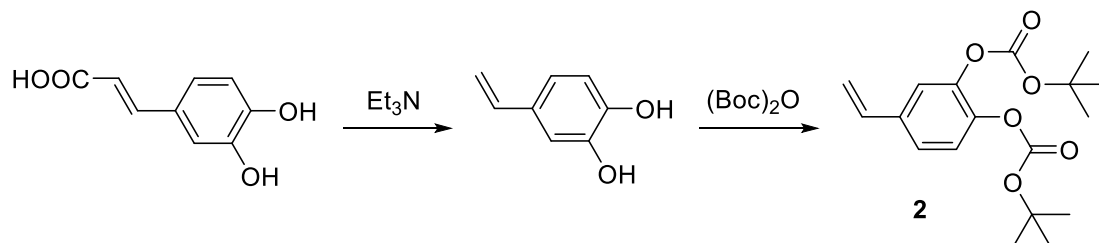

Compound **2** was synthesized (Scheme S2) according to a previously reported procedure.<sup>2</sup> To a two-neck flask was added caffeic acid (8.00 g, 44.4 mmol), *N,N*-dimethylformamide (60 mL), and triethylamine (13.48 g, 133.2 mmol). The solution was stirred at 100°C under a nitrogen atmosphere for 1 h. After cooling to room temperature, the solvent was removed under reduced pressure to give a viscous tan oil, which was purified by column chromatography to give 4-vinylbenzene-1,2-diol as a yellow oil (4.11 g, 68%). <sup>1</sup>H NMR (400 MHz, DMSO-*d*<sub>6</sub>)  $\delta$  8.99 (s, 2H), 6.86 (s, 1H), 6.69 (s, 2H), 6.52 (s, 1H), 5.52 (s, 1H), 5.02 (s, 1H). To a two-neck flask was added di-tert-butyl decarbonate (16.03 g, 73.45 mmol), 4-dimethylaminopyridine (225 mg, 1.84 mmol), and THF (15 mL). After stirring for 10 min, 4-vinylbenzene-1,2-diol (2.50 g, 18.4 mmol) was added. The reaction mixture was stirred for 12 h. After which, the solvent was removed under reduced pressure to give a yellow oil, which was washed with an aqueous solution of ammonium chloride (5 wt%) three times and extracted with ethyl acetate. The crude product was purified by column chromatography to afford **2** as a yellow oil (2.97 g, 48 %). <sup>1</sup>H NMR (400 MHz, Chloroform-*d*)  $\delta$  7.31 – 7.19 (m, 5H), 6.66 (dd, *J* = 17.6, 10.9 Hz, 1H), 5.69 (d, *J* = 17.5 Hz, 1H), 5.27 (d, *J* =

10.9 Hz, 1H), 1.55 (d, J = 2.8 Hz, 18H).

**Scheme S3.** Synthesis of **PPA1**, **PPA2**, **PPA3**, **PPA4**.

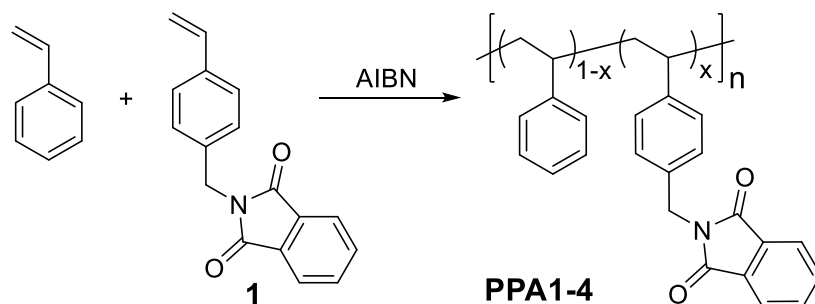

**Table S2.** Feed amount and yield of the synthesis of **PPA1**, **PPA2**, **PPA3**, and **PPA4**.

| Polymer     | Feed amount |             |              |                  | Yield / % |
|-------------|-------------|-------------|--------------|------------------|-----------|
|             | AIBN/mg     | Styrene / g | <b>1</b> / g | 1,4-Dioxane / mL |           |
| <b>PPA1</b> | 40          | 1.56        | 0.44         | 30               | 40        |
| <b>PPA2</b> | 42          | 1.38        | 0.70         | 30               | 58        |
| <b>PPA3</b> | 40          | 1.07        | 0.90         | 30               | 56        |
| <b>PPA4</b> | 43          | 0.95        | 1.20         | 30               | 42        |

**Scheme S4.** Synthesis of **PA1**, **PA2**, **PA3**, and **PA4**.

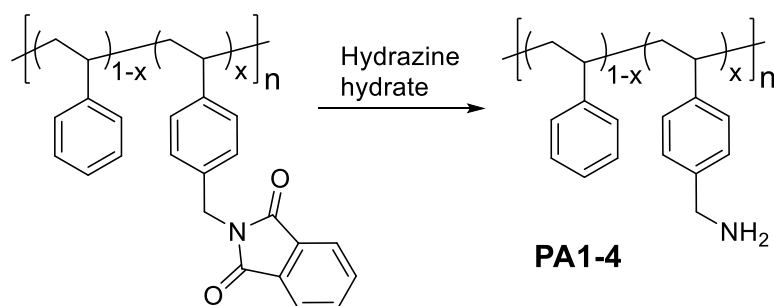

**Table S3.** Feed amount and yield of the synthesis of **PA1**, **PA2**, **PA3**, and **PA4**.

| Polymer after deprotection | Feed amount |                                                    | 1,4-Dioxane/mL | Yield/% |
|----------------------------|-------------|----------------------------------------------------|----------------|---------|
|                            | Polymer/g   | N <sub>2</sub> H <sub>4</sub> ·H <sub>2</sub> O/mL |                |         |
| <b>PA1</b>                 | 0.53        | 0.27                                               | 30mL           | 65      |
| <b>PA2</b>                 | 0.2         | 0.31                                               | 15mL           | 48      |
| <b>PA3</b>                 | 0.6         | 0.6                                                | 30mL           | 71      |
| <b>PA4</b>                 | 0.2         | 0.4                                                | 15mL           | 58      |

**Scheme S5.** Synthesis of **PPC1**, **PPC2**, and **PPC3**.

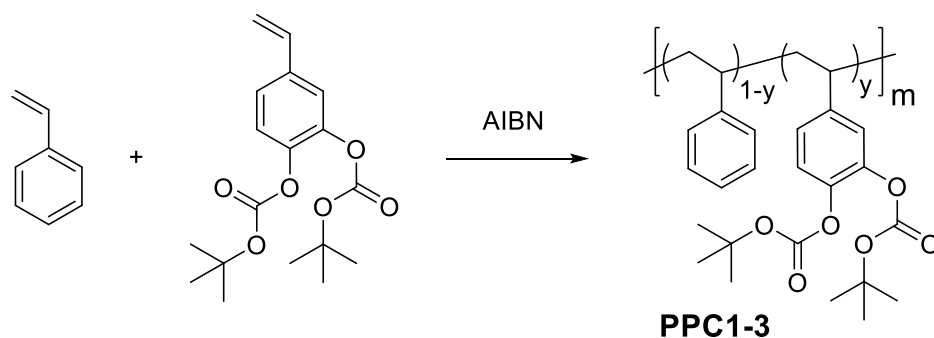

**Table S4.** Feed amount and yield of the synthesis of **PPC1**, **PPC2**, and **PPC3**.

| Polymer     | Feed amount |             |              |                  | Yield / % |
|-------------|-------------|-------------|--------------|------------------|-----------|
|             | AIBN / mg   | Styrene / g | <b>2</b> / g | 1,4-Dioxane / mL |           |
| <b>PPC1</b> | 40          | 1.48        | 0.53         | 30               | 47        |
| <b>PPC2</b> | 41          | 1.05        | 0.98         | 30               | 42        |
| <b>PPC3</b> | 42          | 0.50        | 1.61         | 30               | 60        |

**Scheme S6.** Synthesis of **PC1**, **PC2**, and **PC3**.

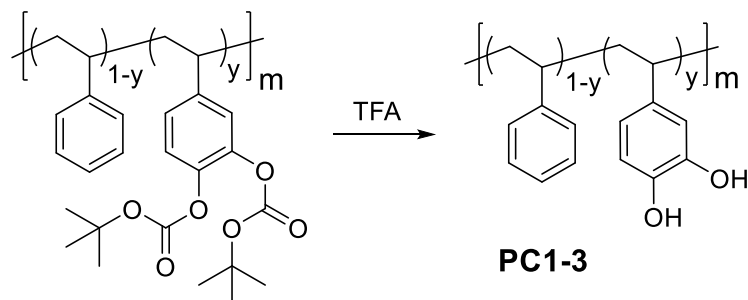

**Table S5.** Feed amount and yield of the synthesis of **PC1**, **PC2**, and **PC3**.

| Polymer after deprotection | Feed amount |        | DCM/mL | Yield/% |
|----------------------------|-------------|--------|--------|---------|
|                            | Polymer/g   | TFA/mL |        |         |
| <b>PC1</b>                 | 0.4         | 0.26   | 25mL   | 65      |
| <b>PC2</b>                 | 0.38        | 0.26   | 25mL   | 46      |
| <b>PC3</b>                 | 0.5         | 0.85   | 25mL   | 39      |

### 3. NMR Data

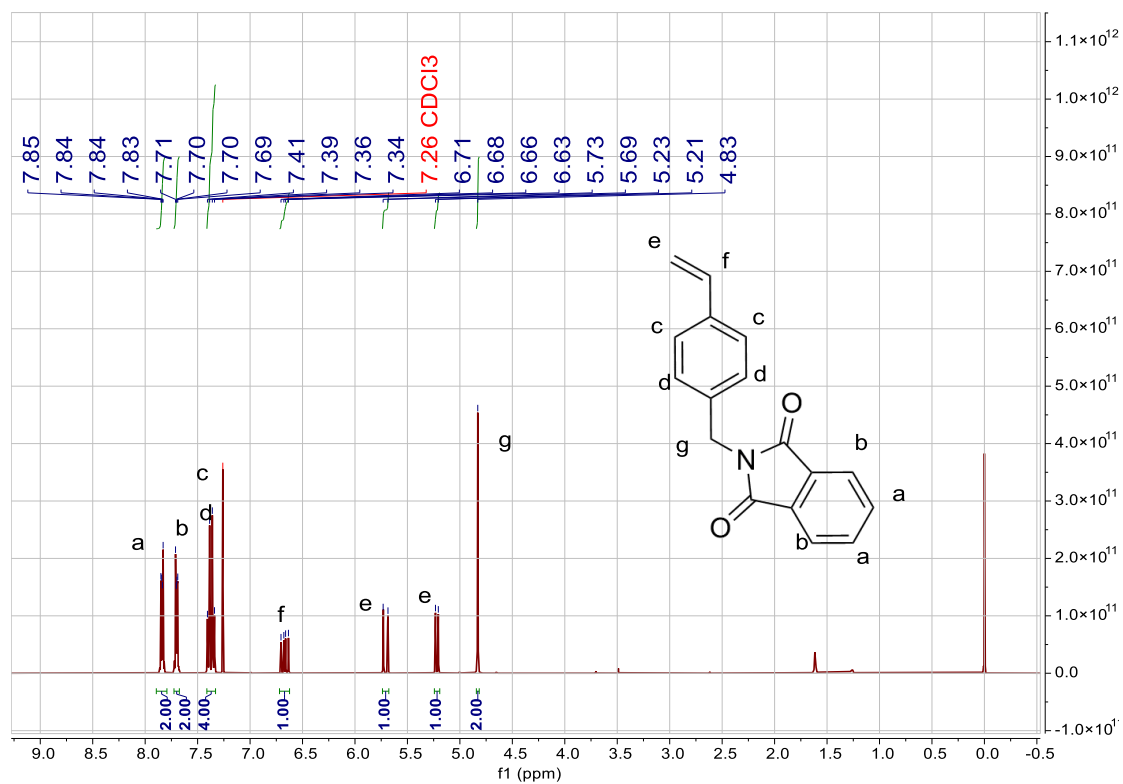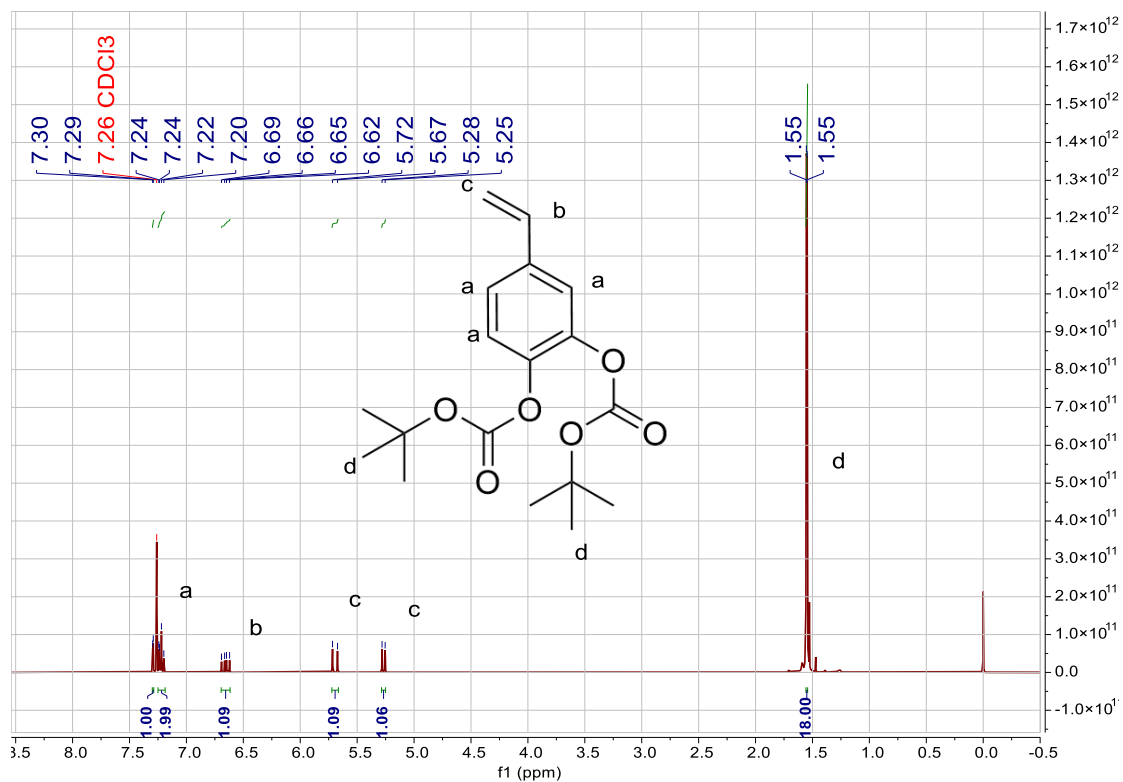

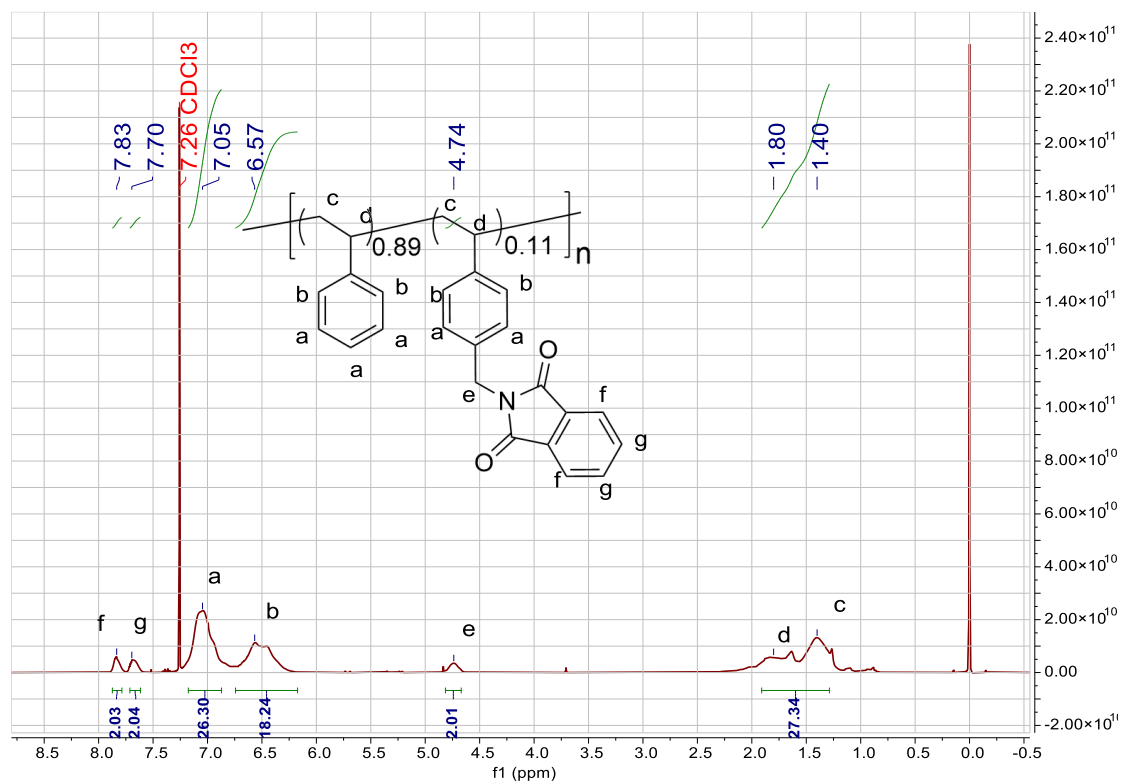

**Figure S3.** <sup>1</sup>H NMR spectrum in CDCl<sub>3</sub> of PPA1.

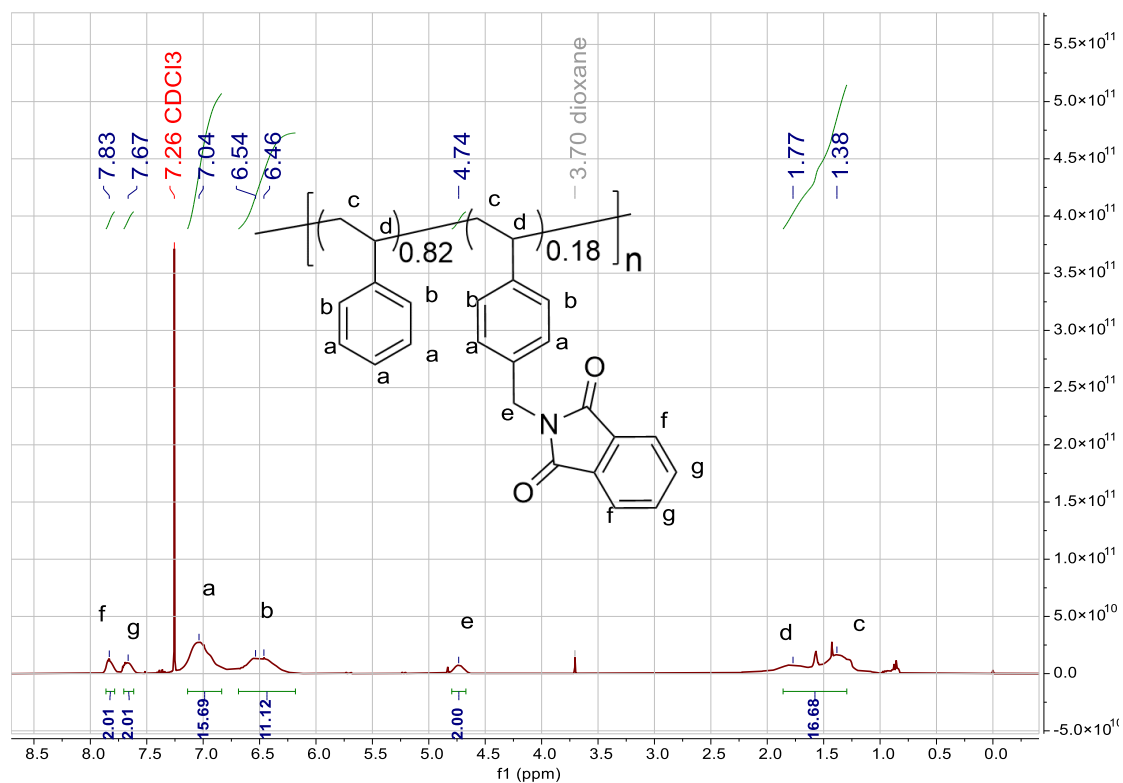

**Figure S4.** <sup>1</sup>H NMR spectrum in CDCl<sub>3</sub> of PPA2. The signal at 3.70 ppm arises from 1,4-dioxane.



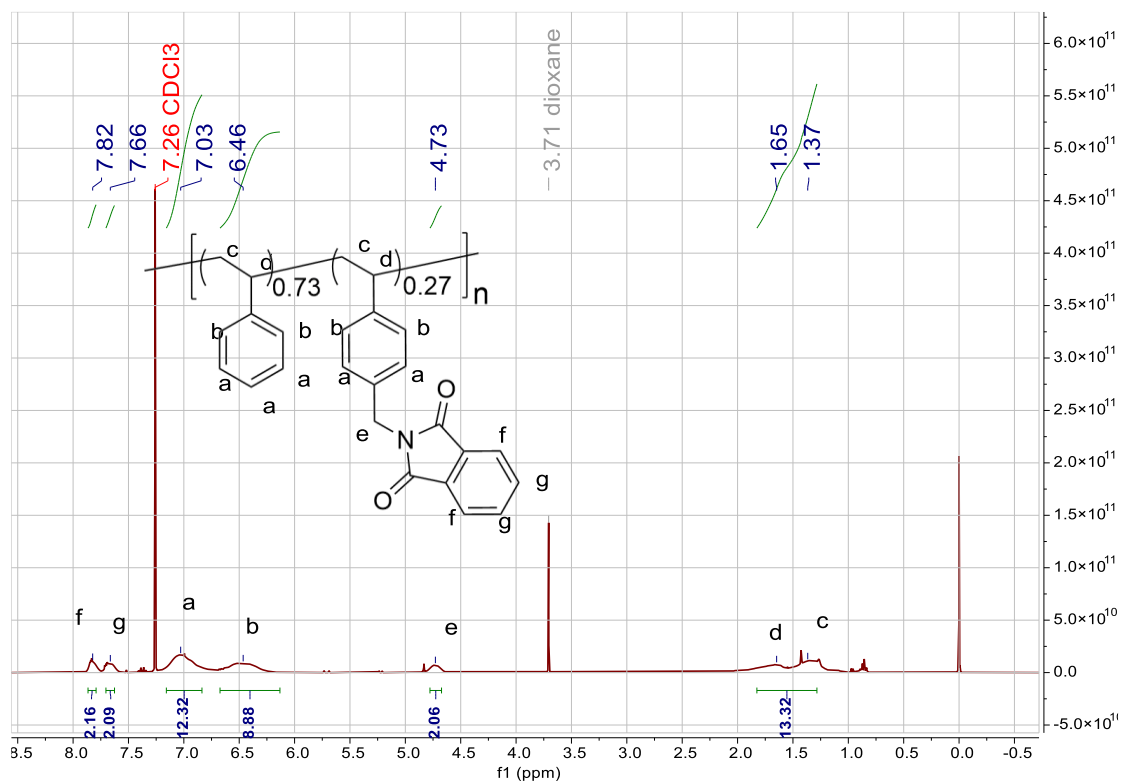

**Figure S5.**  $^1\text{H}$  NMR spectrum in  $\text{CDCl}_3$  of PPA3. The signal at 3.71 ppm arises from 1,4-dioxane.

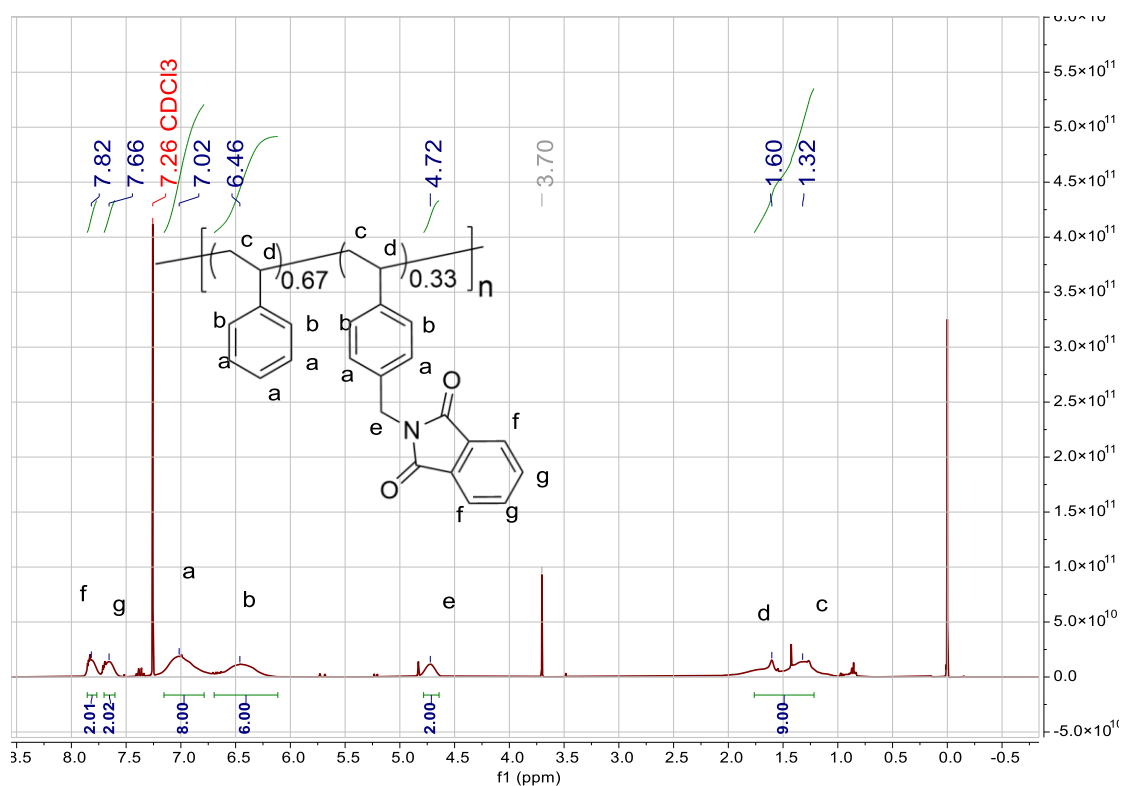

**Figure S6.**  $^1\text{H}$  NMR spectrum in  $\text{CDCl}_3$  of PPA4. The signal at 3.70 ppm arises from 1,4-dioxane.

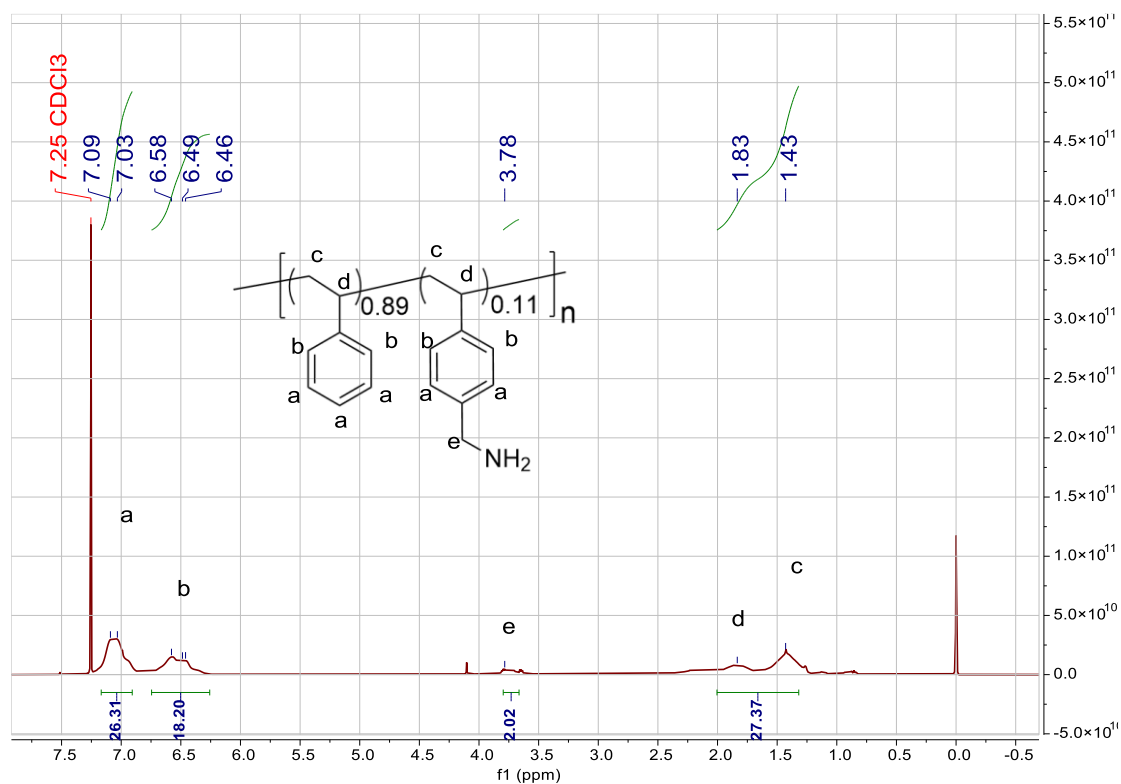

Figure S7.  $^1\text{H}$  NMR spectrum in  $\text{CDCl}_3$  of PA1.

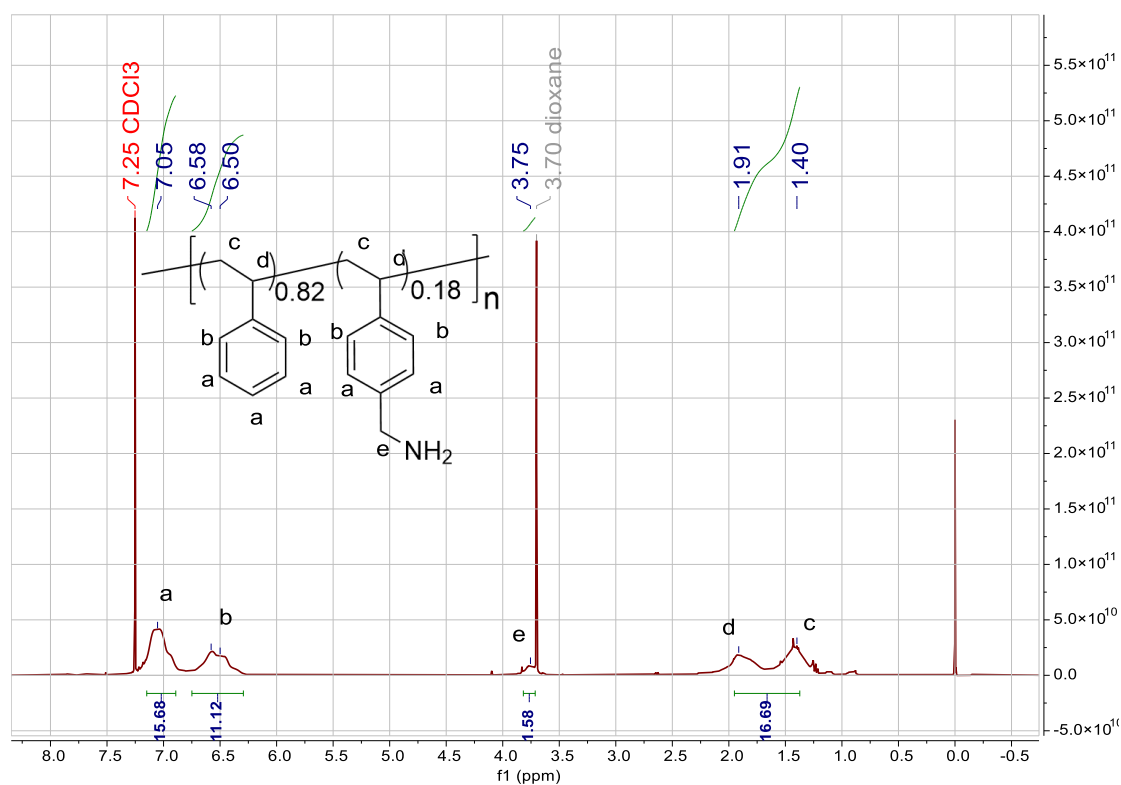

Figure S8.  $^1\text{H}$  NMR spectrum in  $\text{CDCl}_3$  of PA2. The signal at 3.70 ppm arises from 1,4-dioxane.

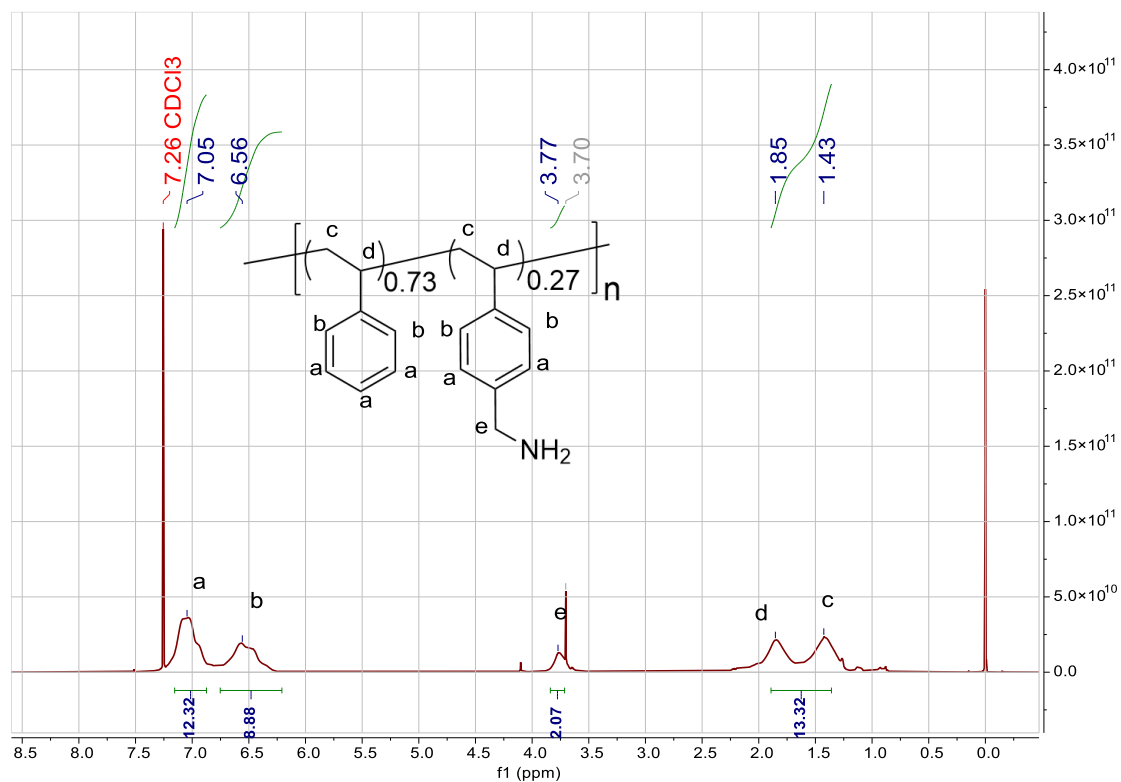

**Figure S9.**  $^1\text{H}$  NMR spectrum in  $\text{CDCl}_3$  of PA3. The signal at 3.70 ppm arises from 1,4-dioxane.

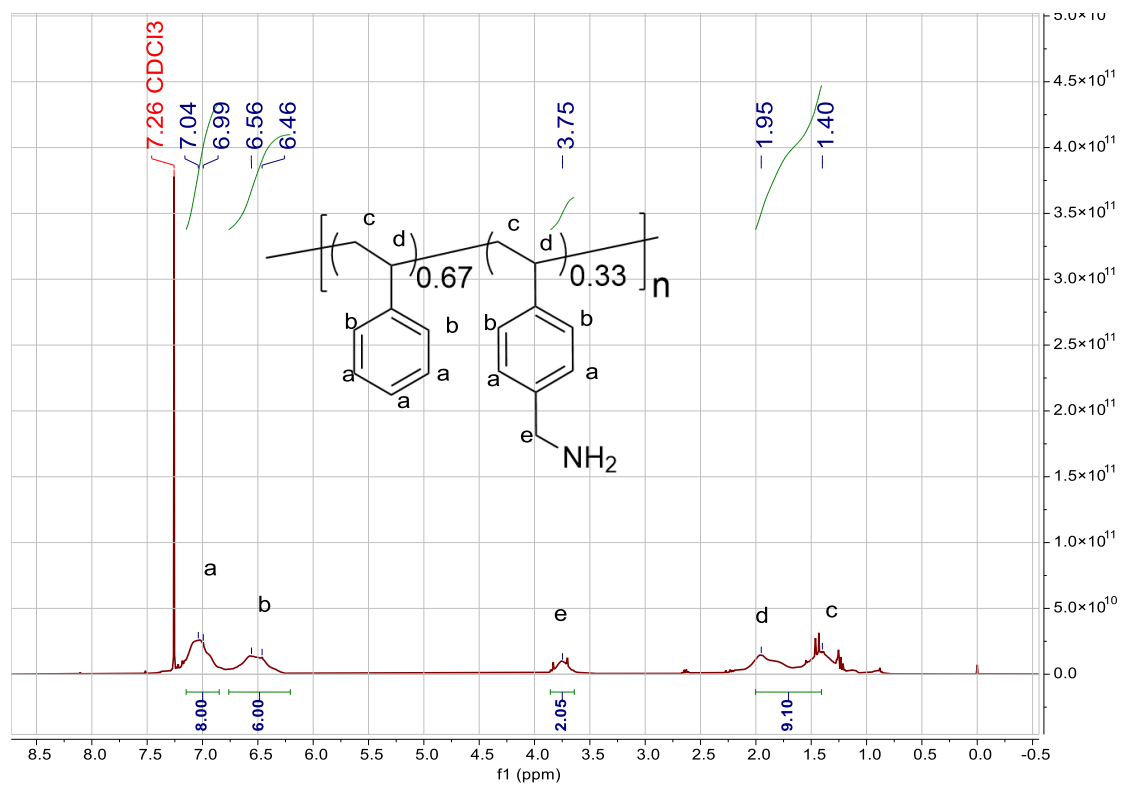

**Figure S10.**  $^1\text{H}$  NMR spectrum in  $\text{CDCl}_3$  of PA4. The signal at 3.70 ppm arises from 1,4-dioxane.

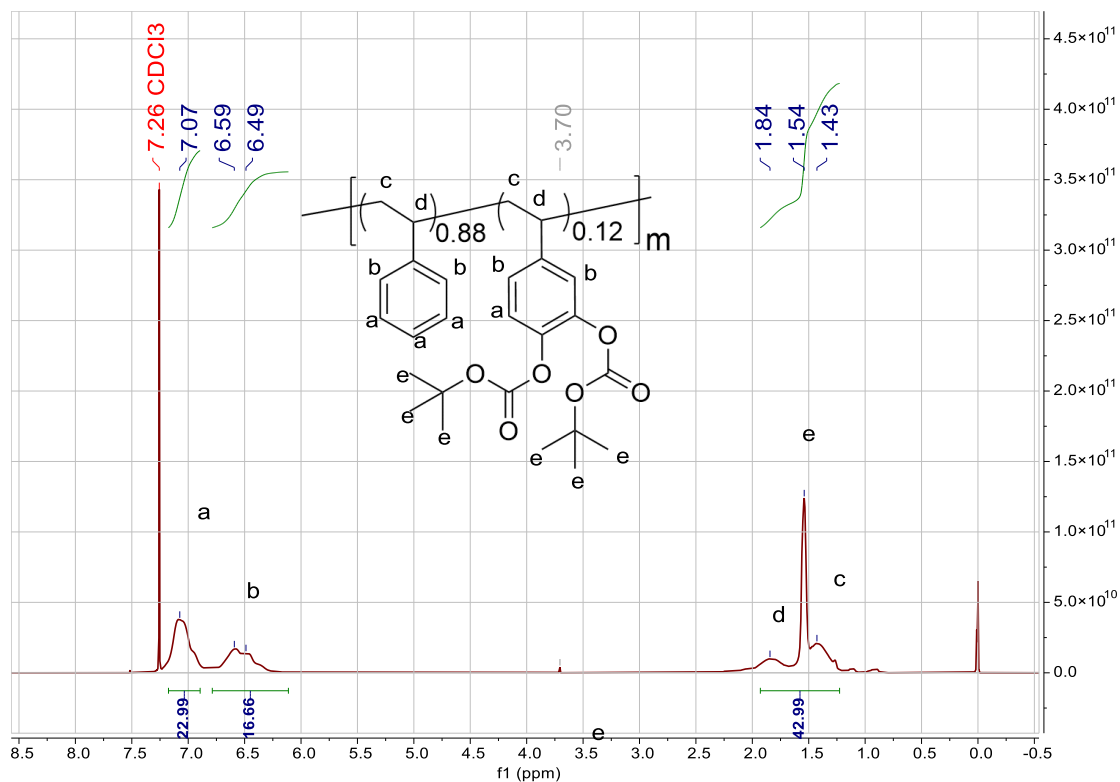

**Figure S11.**  $^1\text{H}$  NMR spectrum in  $\text{CDCl}_3$  of **PPC1**. The signal at 3.70 ppm arises from 1,4-dioxane.

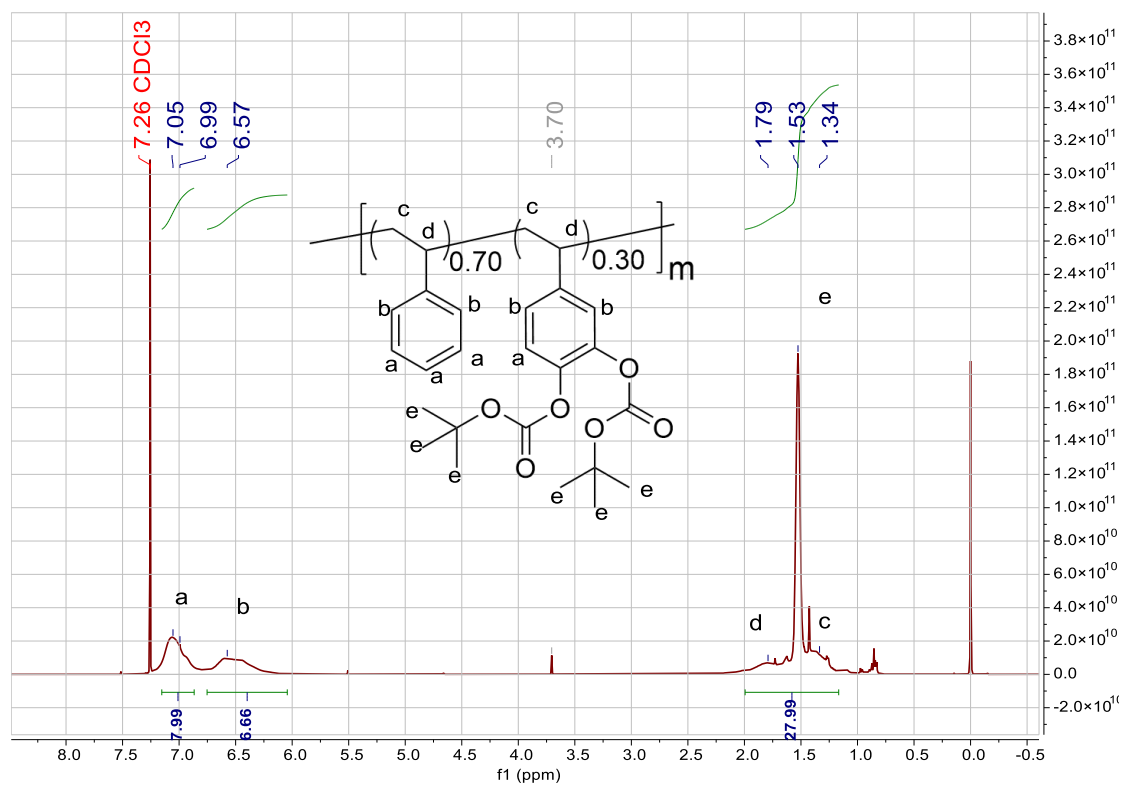

**Figure S12.**  $^1\text{H}$  NMR spectrum in  $\text{CDCl}_3$  of **PPC2**. The signal at 3.70 ppm arises from 1,4-dioxane.

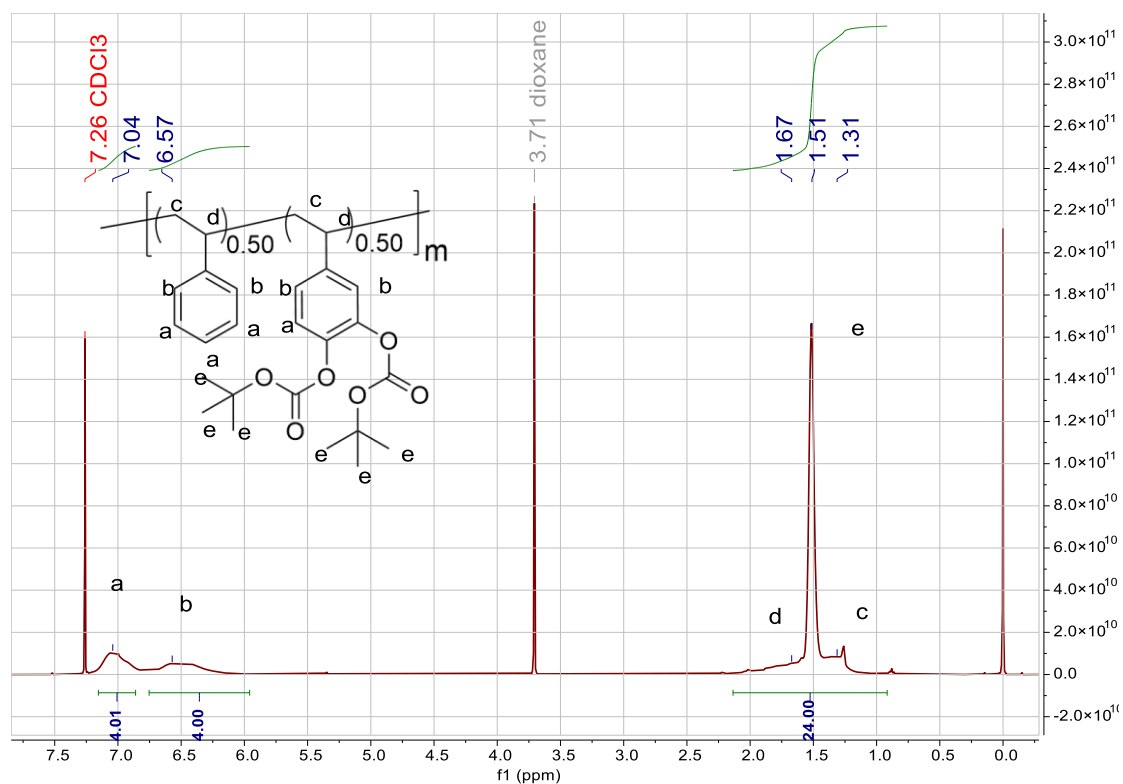

**Figure S13.**  $^1\text{H}$  NMR spectrum in  $\text{CDCl}_3$  of PPC3. The signal at 3.71 ppm arises from 1,4-dioxane.

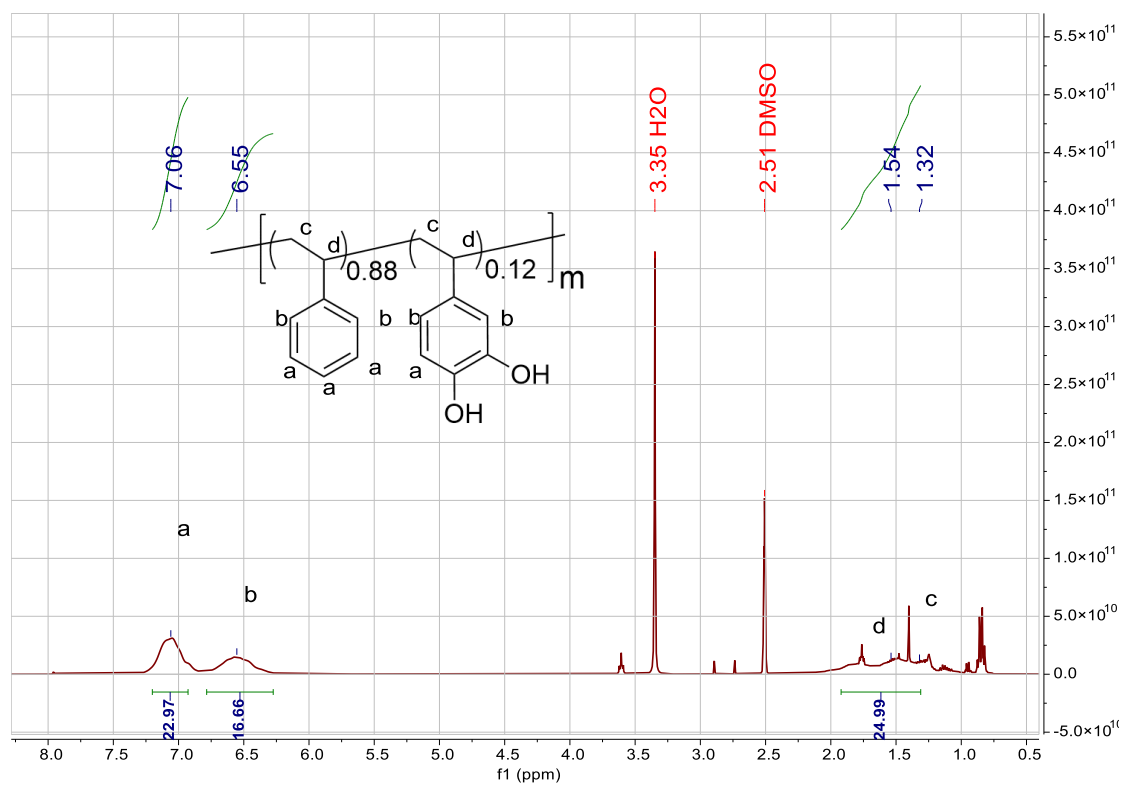

**Figure S14.**  $^1\text{H}$  NMR spectrum in DMSO of PC1. The signal at 3.35 ppm arises from water.

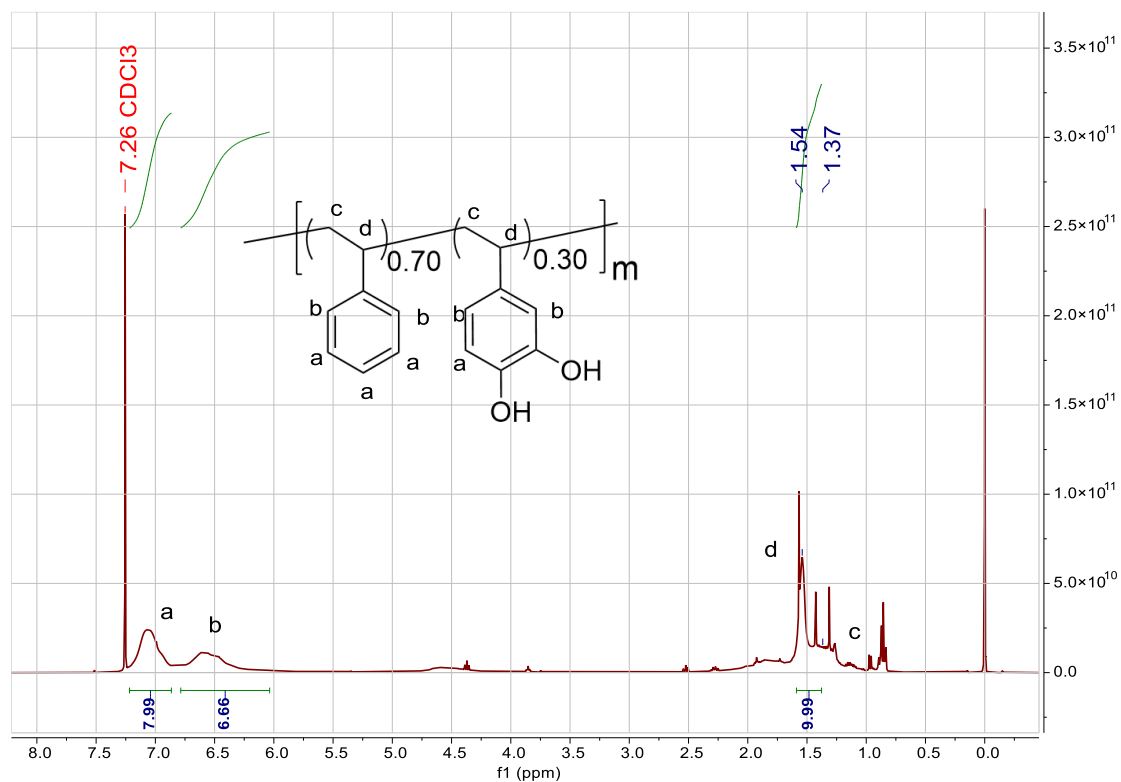

**Figure S15.**  $^1\text{H}$  NMR spectrum in  $\text{CDCl}_3$  of **PC2**.

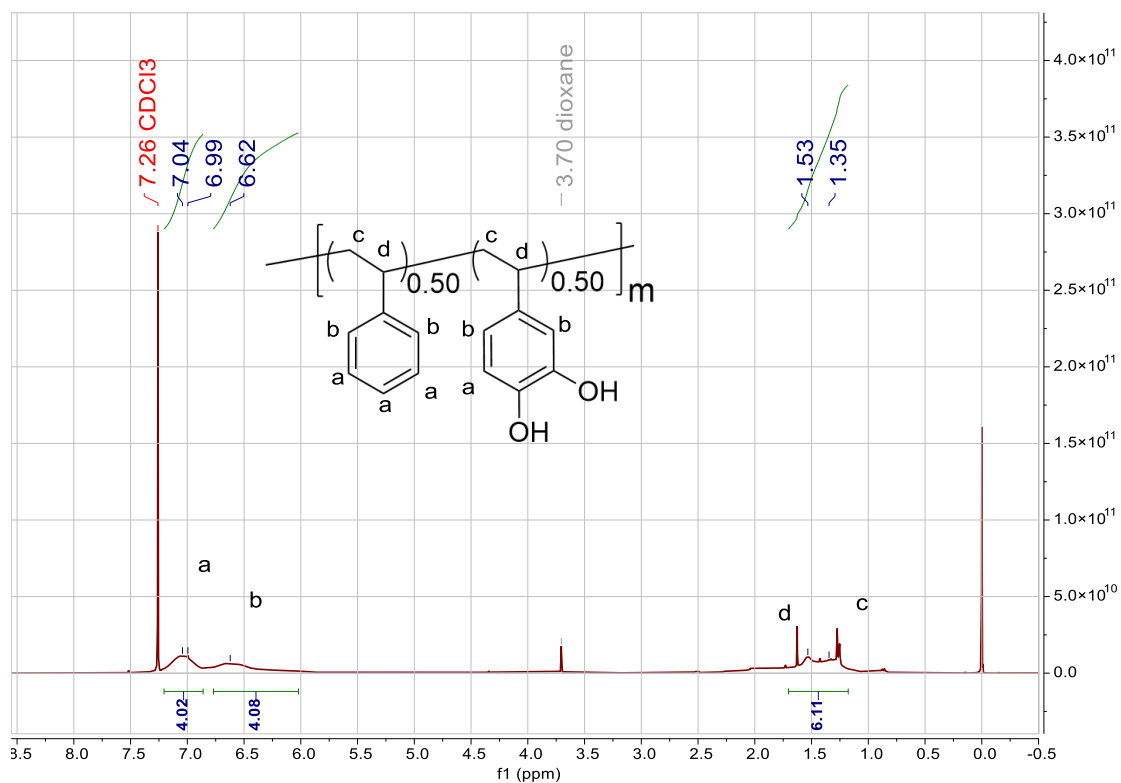

**Figure S16.**  $^1\text{H}$  NMR spectrum in  $\text{CDCl}_3$  of **PC3**. The signal at 3.70 ppm arises from 1,4-dioxane.

## 4. DLS Data

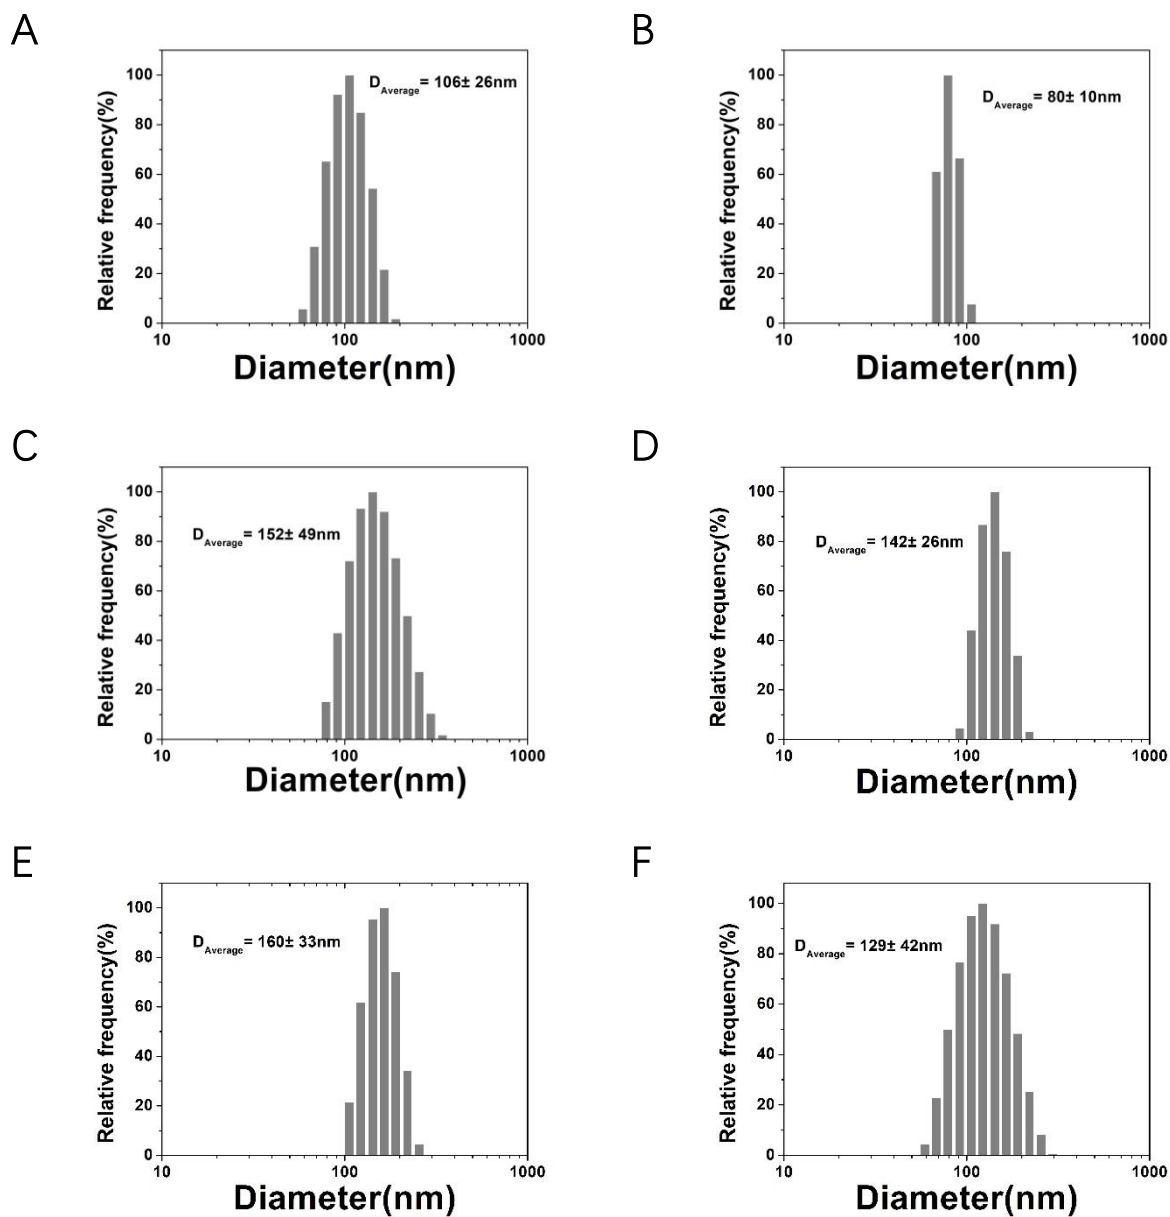

**Figure S17.** Size distributions of nanoparticles prepared by using (A) **PC1** (5 mol%), (B) **PA3** (5 mol%), (C) **PC1/PA3** (5/5 mol%), and (D) **PC1/PA3** (10/10 mol%), (E) **PC1/PA3** (15/15 mol%), (F) **PC1/PA3** (20/20 mol%).

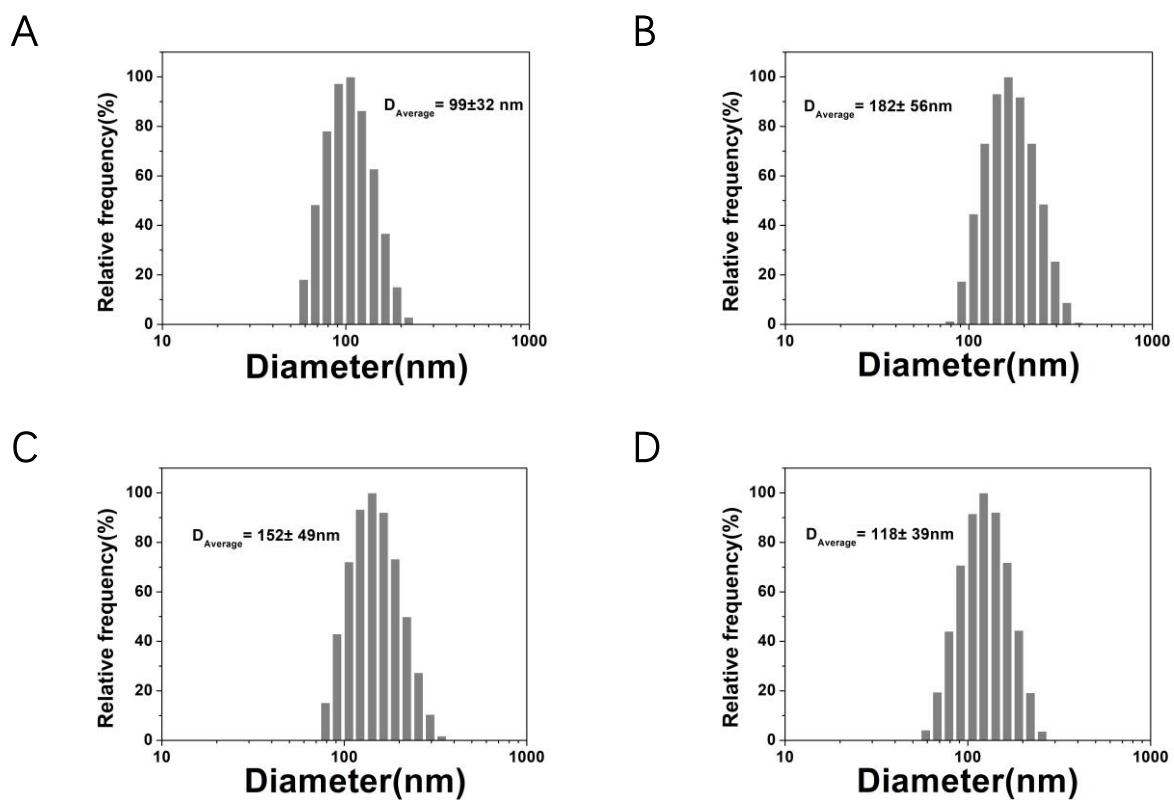

**Figure S18.** Size distributions of nanoparticles prepared by using (A) **PC1/PA1** (5/5 mol%), (B) **PC1/PA2** (5/5 mol%), (C) **PC1/PA3** (5/5 mol%), and (D) **PC1/PA4** (5/5 mol%).



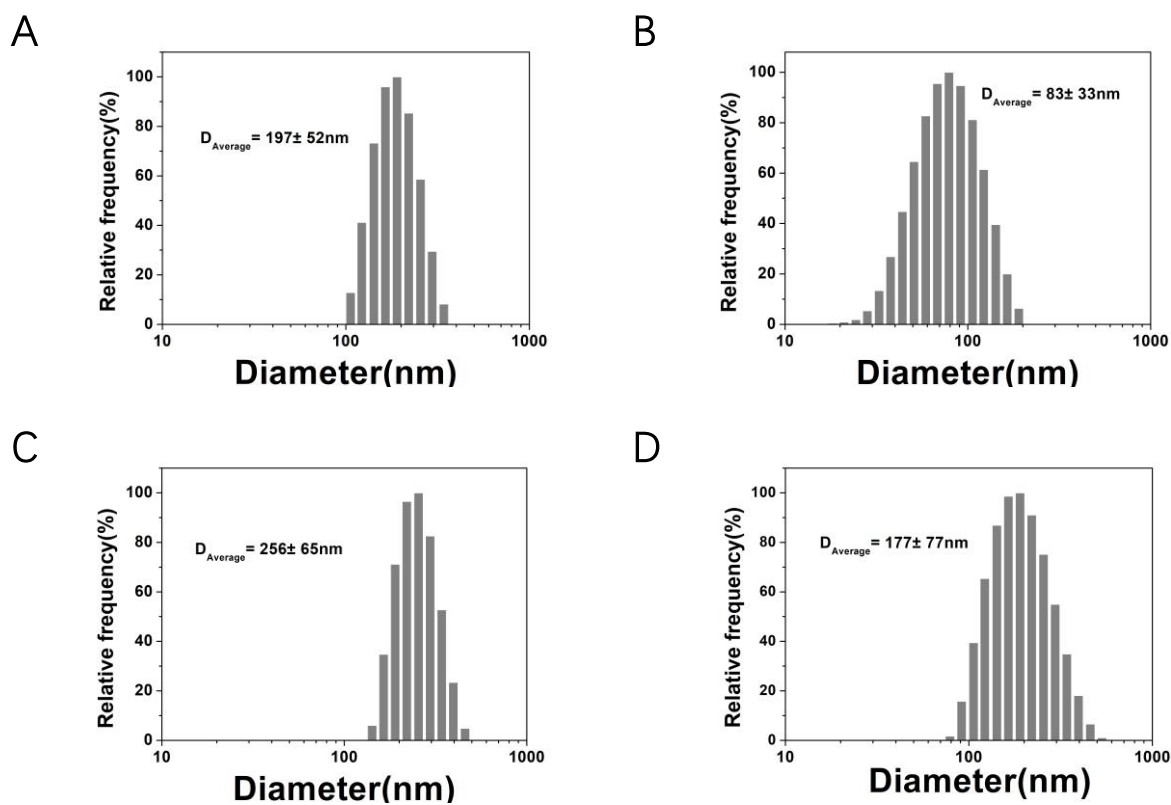

**Figure S19.** Size distributions of nanoparticles prepared by using (A) **PC2/PA1** (5/5 mol%), (B) **PC2/PA2** (5/5 mol%), (C) **PC2/PA3** (5/5 mol%), and (D) **PC2/PA4** (5/5 mol%).

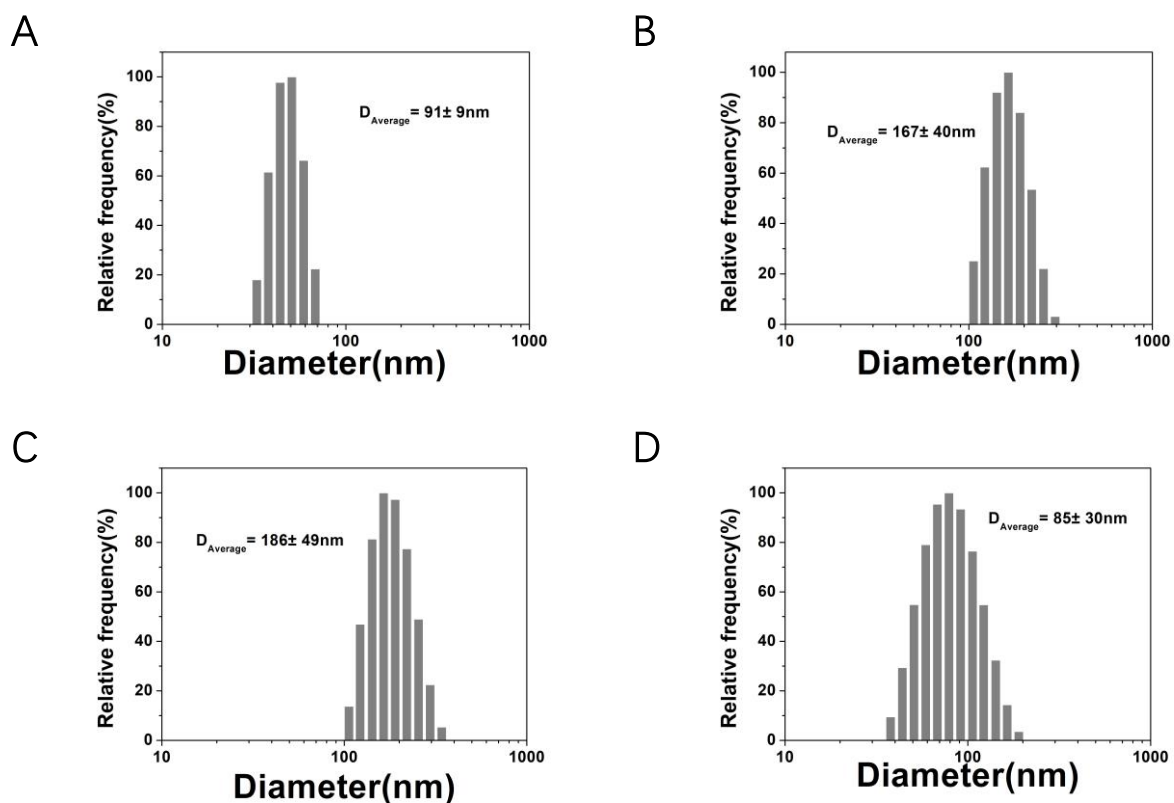

**Figure S20.** Size distributions of nanoparticles prepared by using (A) PC3/PA1 (5/5 mol%), (B) PC3/PA2 (5/5 mol%), (C) PC3/PA3 (5/5 mol%), and (D) PC3/PA4 (5/5 mol%).

## 5. TEM Image

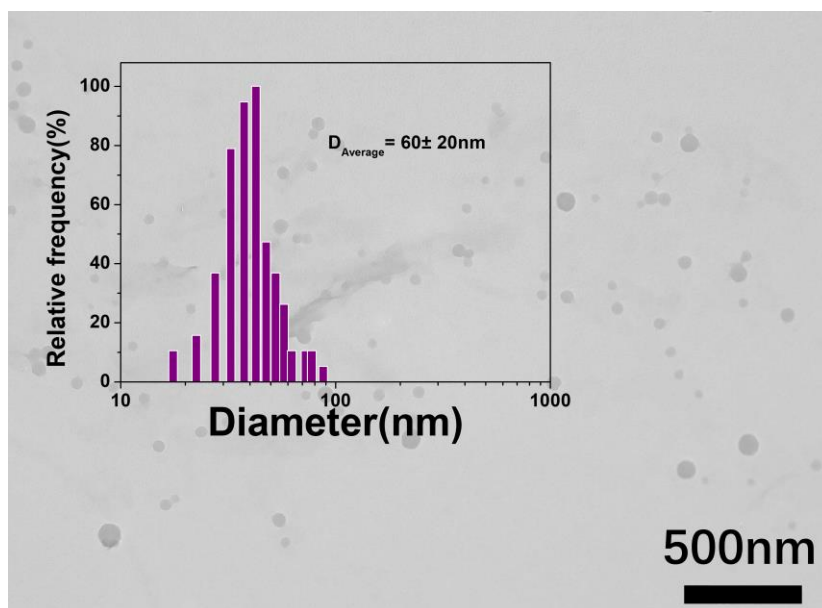

**Figure S21.** Typical TEM image and the corresponding size distribution determined by TEM of the reused nanoparticle catalysts prepared using **PA3** and **PC3**.

## 6. FT-IR spectra

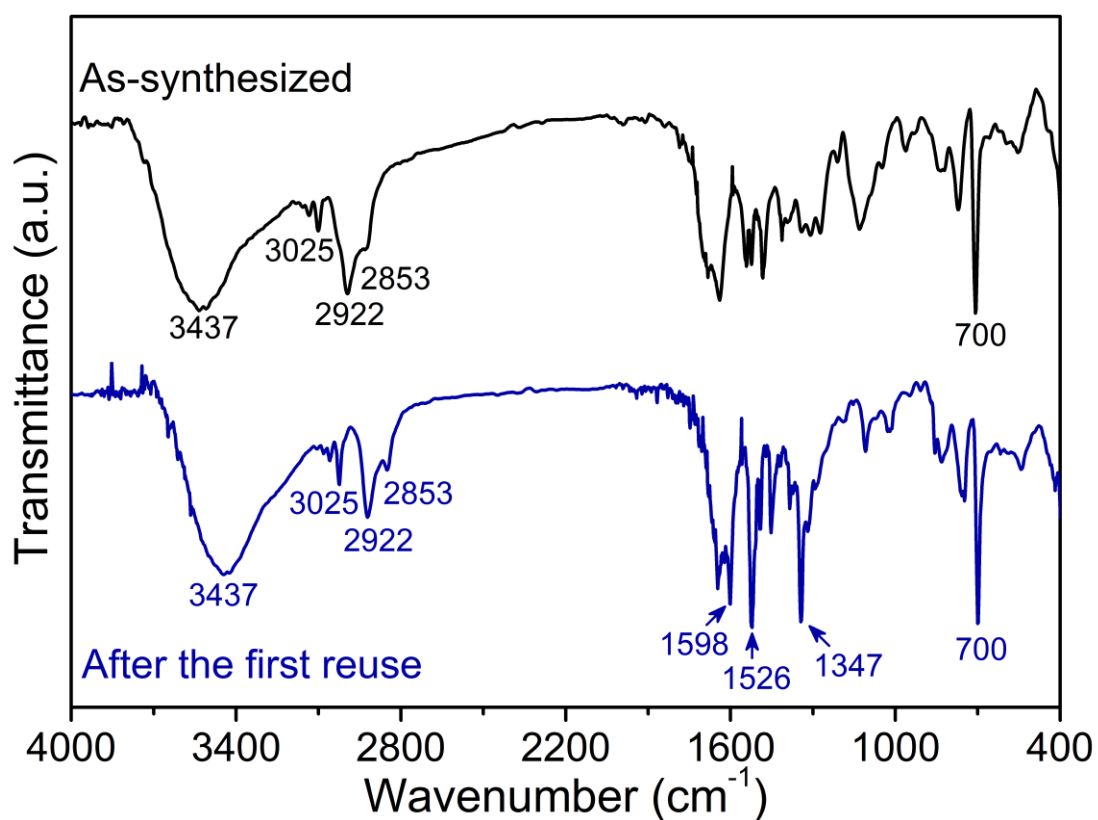

**Figure S22.** FT-IR spectra of the as-synthesized and after the first reused nanoparticle catalysts prepared using **PA3** and **PC3**. The characteristic bands of benzene groups were found at 3025 cm<sup>-1</sup> and 700 cm<sup>-1</sup>. The characteristic bands of -CH<sub>2</sub>-groups were observed at 2922 cm<sup>-1</sup> and 2853 cm<sup>-1</sup>. A broad band at 3437 cm<sup>-1</sup> was assigned to -OH and -NH<sub>2</sub> groups. The characteristic band of -C=N- groups was detected at 1598 cm<sup>-1</sup>. The formation of -C=N- was ascribed to the reaction between benzylamine groups of catalysts and 4NBA. The characteristic bands of -NO<sub>2</sub> groups were observed at 1526 cm<sup>-1</sup> and 1347 cm<sup>-1</sup>.

## 7. Condensation reactions

**Table S6.** Condensation reactions catalyzed by **PA3/PC3**.<sup>a</sup>

| Entry | Substrate                                                                                                                | Product                                                                                                     | Conversion                                                                                                                                | Selectivity |       |
|-------|--------------------------------------------------------------------------------------------------------------------------|-------------------------------------------------------------------------------------------------------------|-------------------------------------------------------------------------------------------------------------------------------------------|-------------|-------|
| 1     | 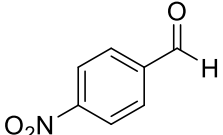 <chem>O=Cc1ccc([N+](=O)[O-])cc1</chem> |  <chem>NC#CC#N</chem>      |  <chem>O=C=C(C#N)C#Nc1ccc([N+](=O)[O-])cc1</chem>       | > 99%       | > 99% |
| 2     |  <chem>O=Cc1ccc([N+](=O)[O-])cc1</chem> |  <chem>CCOC(=O)CC#N</chem> |  <chem>CCOC(=O)C=C(C#N)C#Nc1ccc([N+](=O)[O-])cc1</chem> | > 99%       | > 99% |

<sup>a</sup> Reaction condition: **PA3/PC3** (5/5 mol%, effective constituent ratio, relative to 4-NBA), kept at 60 °C under nitrogen atmosphere for 5 h.

## 8. References

1. Thielbeer, F.; Johansson, E. M.; Chankeshwara, S. V.; Bradley, M., Influence of spacer length on the cellular uptake of polymeric nanoparticles. *Macromol Biosci* **2013**, *13* (6), 682-6.
2. Takeshima, H.; Satoh, K.; Kamigaito, M., Scalable Synthesis of Bio-Based Functional Styrene: Protected Vinyl Catechol from Caffeic Acid and Controlled Radical and Anionic Polymerizations Thereof. *ACS Sustain. Chem. Eng.* **2018**, *6* (11), 13681-13686.
